# Supplementary material
Source: Springer Nature journal article supplement (https://www.springermedizin.de/resource/supplementary/12891_2013_2128_MOESM3_ESM.pdf/9509492)

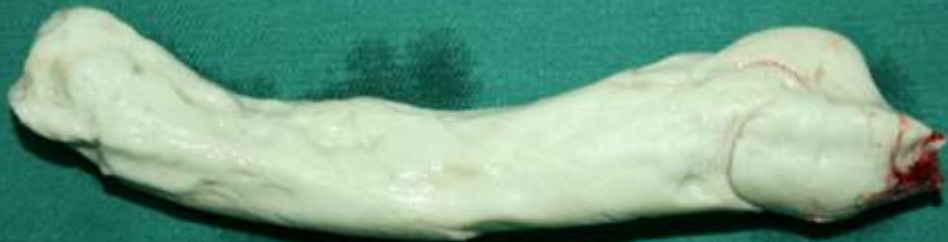

**A**

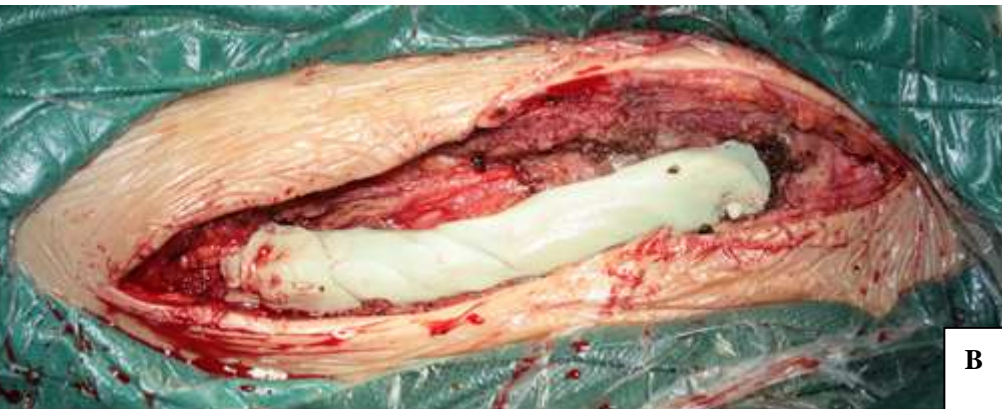

**B**

Supplement: MOESM3 [file 9509492]
